# Supplementary material
Source: Springer Nature journal article supplement (https://www.springermedizin.de/resource/supplementary/12995_2013_229_MOESM1_ESM.pdf/9622952)
Supplement: MOESM1 [file 9622952]

# Occupational asthma (OA) (new onset WRA)

```
graph TD; OA[Occupational asthma (OA)  
(new onset WRA)] --> IgE[IgE  
media-  
ted OA]; OA --> Specific[OA  
due to  
specific  
occupational  
agents with  
unknown  
patho-  
mechanism]; OA --> Irritant[Irritant  
OA]
```

IgE  
media-  
ted OA

OA  
due to  
specific  
occupational  
agents with  
unknown  
patho-  
mechanism

Irritant  
OA
